# Supplementary material for: CD47 blockade reverses resistance to HDAC inhibitor by liberating anti-tumor capacity of macrophages
Source: Springer Nature journal article supplement (doi:10.1186/s13046-025-03335-5), 2025-02-24
Supplement: MOESM1 [file 13046_2025_3335_MOESM1_ESM.pdf]

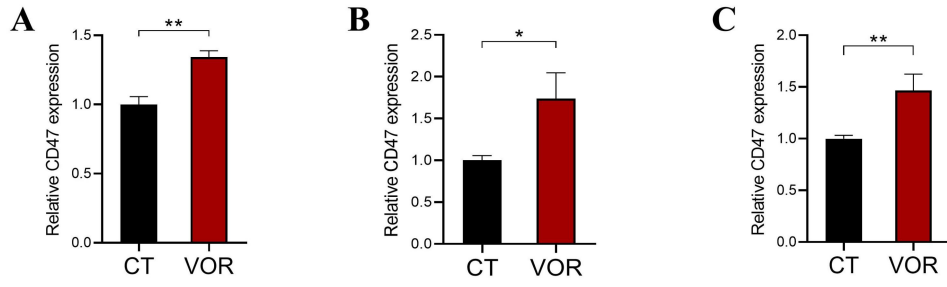

**Figure S1.** SW480 CRC cells (A), PANC-1 pancreatic cancer cells (B), and MDA-MB-231 breast cancer cells (C) were stimulated with VOR for 12 hours, the expression of CD47 was evaluated by QPCR. \* $p < 0.05$ ; \*\* $p < 0.01$ ; unpaired, two-tailed Student's  $t$  test.

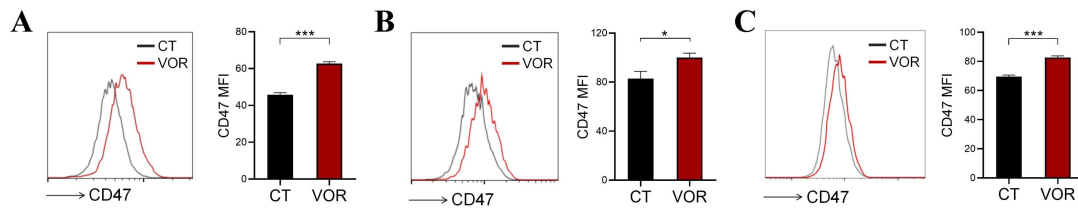

**Figure S2.** SW480 CRC cells (A), PANC-1 pancreatic cancer cells (B), and MDA-MB-231 breast cancer cells (C) were stimulated with VOR for 24 hours, the expression of CD47 was evaluated by flow cytometry. \* $p < 0.05$ ; \*\*\* $p < 0.001$ ; unpaired, two-tailed Student's  $t$  test.

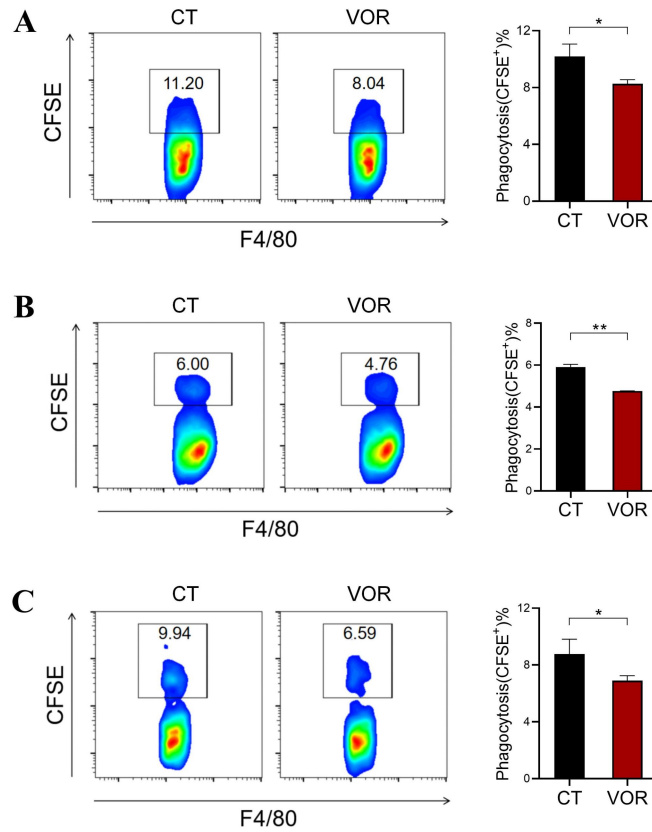

**Figure S3.** SW480 CRC cells (A), PANC-1 pancreatic cancer cells (B), and MDA-MB-231 breast cancer cells (C) were treated with VOR for 24 hours and labeled with CFSE, followed by the co-incubation with mouse peritoneal macrophages overnight. The phagocytosis of macrophages was evaluated by flow cytometry. \* $p < 0.05$ ; \*\* $p < 0.01$ ; unpaired, two-tailed Student's t test.

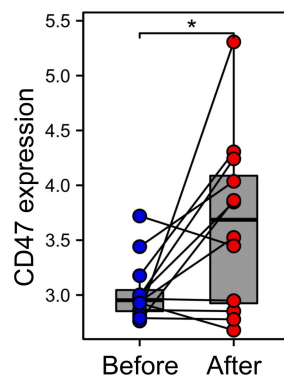

**Figure S4.** The expression of CD47 in isolated CD34<sup>+</sup> cells from patients pre- and post-entinostat treatment was analyzed using a GEO dataset (GSE16625). \* $p < 0.05$ , paired,

two-tailed Student's  $t$  test.
